# Supplementary material for: Nipple Reconstruction with the Biodesign Nipple Reconstruction Cylinder: A Prospective Clinical Study
Source: PubMed Central journal article supplement — Plast Reconstr Surg Glob Open. 2016 Aug 9;4(8):e832. doi: 10.1097/GOX.0000000000000846 (PMC5010323; doi:10.1097/gox.0000000000000846), 2016-08-09
Supplement: gox-4-0e832-s001.pdf [file gox-4-0e832-s001.pdf]

**Supplemental Digital Content 1** – This images depict schematically the standardized surgical procedure used in the study.

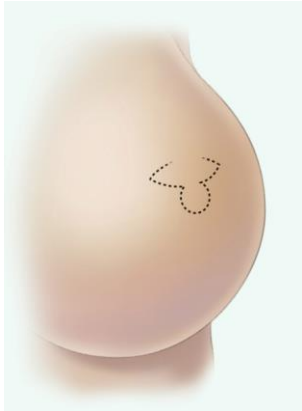

A: The position of the nipple was marked with a surgical marker to guide the creation of the skin flap.

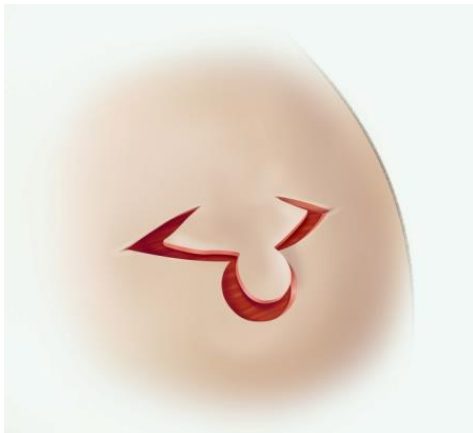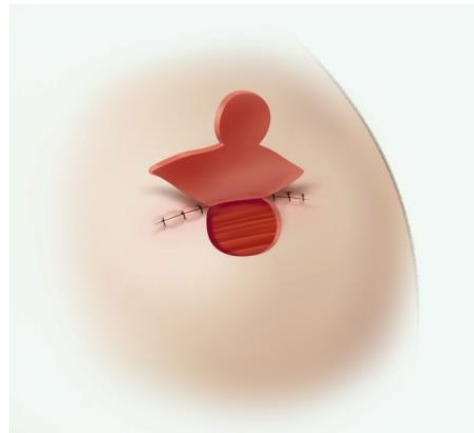

B: Breast tissue flaps were raised at the superficial subcutaneous level to preserve the subdermal plexus using either a C-V or S-flap technique.

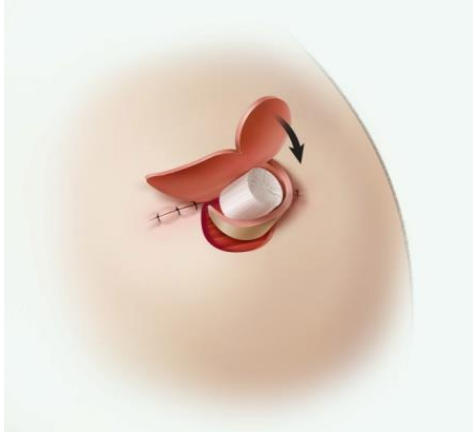

C: The flaps were formed into an appropriately sized silo to create the appearance of a breast nipple. The fully rehydrated NRC was then inserted into the silo formed from the skin flap so as to bolster and maintain flap projection.

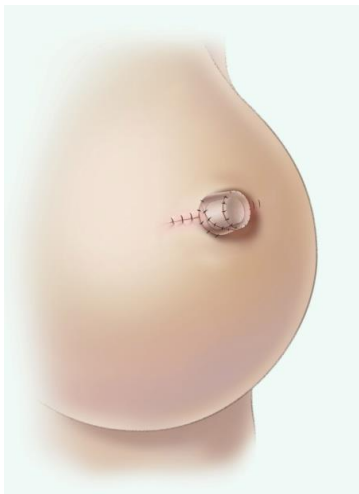

D: The cylinder was secured into place with a combination of 3-0 Vicryl and 4-0 Monocryl (Ethicon, Somerville, NJ) sutures at the base of the nipple reconstruction to prevent migration of the cylinder into the subcutaneous region under the flaps. After reconstruction, incisions were closed with a combination of inverted dermal 3-0 Vicryl sutures and simple interrupted 4-0 Monocryl sutures.

**Supplemental Digital Content 2** – The satisfaction questionnaire is presented.

By checking ONE box in each row below, please indicate how satisfied with your nipple reconstruction operation today.

1 = Very displeased, 2 = Displeased, 3 = Neither pleased nor displeased, 4 = Pleased, 5 = Very pleased

---

**Satisfaction questionnaire**

Breast:  Right  Left

|                                                                             |                         |                         |                         |                         |                         |
|-----------------------------------------------------------------------------|-------------------------|-------------------------|-------------------------|-------------------------|-------------------------|
| I am pleased to have had nipple reconstruction:                             | <input type="radio"/> 1 | <input type="radio"/> 2 | <input type="radio"/> 3 | <input type="radio"/> 4 | <input type="radio"/> 5 |
| I am pleased with the <u>position</u> of my reconstructed nipple:           | <input type="radio"/> 1 | <input type="radio"/> 2 | <input type="radio"/> 3 | <input type="radio"/> 4 | <input type="radio"/> 5 |
| I am pleased with the <u>overall appearance</u> of my reconstructed nipple: | <input type="radio"/> 1 | <input type="radio"/> 2 | <input type="radio"/> 3 | <input type="radio"/> 4 | <input type="radio"/> 5 |
| I am pleased with the <u>symmetry</u> of my reconstructed nipple:           | <input type="radio"/> 1 | <input type="radio"/> 2 | <input type="radio"/> 3 | <input type="radio"/> 4 | <input type="radio"/> 5 |
| I am pleased with the <u>color</u> of my reconstructed nipple:              | <input type="radio"/> 1 | <input type="radio"/> 2 | <input type="radio"/> 3 | <input type="radio"/> 4 | <input type="radio"/> 5 |
| I am pleased with the <u>softness</u> of my reconstructed nipple:           | <input type="radio"/> 1 | <input type="radio"/> 2 | <input type="radio"/> 3 | <input type="radio"/> 4 | <input type="radio"/> 5 |
| I am pleased with the <u>sensation</u> of my reconstructed nipple:          | <input type="radio"/> 1 | <input type="radio"/> 2 | <input type="radio"/> 3 | <input type="radio"/> 4 | <input type="radio"/> 5 |
| I am pleased with the appearance of my reconstructed nipple when nude:      | <input type="radio"/> 1 | <input type="radio"/> 2 | <input type="radio"/> 3 | <input type="radio"/> 4 | <input type="radio"/> 5 |
| I am pleased with the appearance of my reconstructed nipple when clothed:   | <input type="radio"/> 1 | <input type="radio"/> 2 | <input type="radio"/> 3 | <input type="radio"/> 4 | <input type="radio"/> 5 |
| I am pleased with the <u>size</u> of my reconstructed nipple:               | <input type="radio"/> 1 | <input type="radio"/> 2 | <input type="radio"/> 3 | <input type="radio"/> 4 | <input type="radio"/> 5 |

**Satisfaction**

I would recommend the nipple reconstruction operation to another woman:  Yes  No

My reconstructed nipple has contributed to my sex life:  Yes  No
